1  
2  
3  
4  
5  
6  
7  
8  
9  
10  
11  
12  
13  
14  
15  
16  
17  
18  
19  
20  
21  
22  
23  
24  
25  
26  
27  
28  
29  
30  
31

**The fly liquid-food electroshock assay (FLEA) reveals opposite roles for neuropeptide F in avoidance of bitterness and shock.**

Puskar Mishra<sup>1,2</sup>, Shany E. Yang<sup>1</sup>, Austin B. Montgomery<sup>1</sup>, Addison R. Reed<sup>1</sup>, Aylin R. Rodan<sup>1,3,4,5</sup> and Adrian Rothenfluh<sup>1,4,6,7,\*</sup>

<sup>1</sup>Molecular Medicine Program; <sup>2</sup>Department of Bioengineering; <sup>3</sup>Department of Internal Medicine, Division of Nephrology & Hypertension; <sup>4</sup>Department of Human Genetics, University of Utah, Salt Lake City, UT, USA; <sup>5</sup>Medical Service, Veterans Affairs Salt Lake City Health Care System; <sup>6</sup>Department of Psychiatry; <sup>7</sup>Department of Neurobiology & Anatomy, University of Utah, Salt Lake City, UT, USA.

**Author contributions:** P.M. and A.R. designed research; P.M. performed experiments and designed electrical boards, data acquisition and analysis tools; S.E.Y. and A.R.Re. performed experiments; A.B.M. worked on software tools; A.R.Ro. and A.R. procured funding; P.M., S.E.Y., A.B.M., A.R.Ro., and A.R. wrote the paper.

The authors declare no competing interests.

\*to whom correspondence should be addressed: e-mail: [Adrian.Rothenfluh@hsc.utah.edu](mailto:Adrian.Rothenfluh@hsc.utah.edu)

32 **ABSTRACT**

33 Proper regulation of feeding is important for an organism's well-being and survival. Food intake  
34 in *Drosophila* can be determined in a number of ways, including by measuring the time a fly's  
35 proboscis interacts with a food source in the fly liquid-food interaction counter (FLIC). Here, we  
36 show that electrical current flowing through flies during this interaction is aversive and leads to a  
37 reduction in food intake. Based on the FLIC, we engineer a novel assay, the fly liquid-food  
38 electroshock assay (FLEA), which allows for current adjustments for each feeding well. Using  
39 the FLEA, we show that both external incentives as well as internal motivational state can serve  
40 as drivers for flies to overcome higher current (electric shock) to obtain superior food. Unlike  
41 similar assays in which bitterness is the aversive stimulus for the fly to overcome, we show that  
42 current perception is not discounted as flies become more food-deprived. The FLEA is  
43 therefore a novel assay to accurately measure incentive motivation in *Drosophila*. Using the  
44 FLEA, we also show that neuropeptide F is required for proper perception or processing of an  
45 electroshock, a novel function for this neuropeptide involved in processing of external and  
46 internal stimuli.

47

48 **Significance Statement**

49 Many neuropsychiatric disorders, such as depression or addiction, are associated with  
50 alterations in motivated behavior. Assays measuring incentive motivation determine how driven  
51 an organism is to attain a goal, like food, or how attractive an incentive is. These tests require  
52 the animal to put effort into obtaining the reward, which can include physical work or overcoming  
53 an aversive stimulus. Such assays for *Drosophila* feeding have relied on flies overcoming  
54 bitterness to obtain their food. However, the perception of bitterness is discounted as flies  
55 become food deprived, confounding the interpretation. Here, we developed a novel assay that  
56 does not suffer from the same shortcomings and thus allows for more accurate assessments of  
57 incentive motivation in this widely used model organism.

58

59

## 60 INTRODUCTION

61 Motivation can be regarded as an organism's goal-directed quest for change, for example the  
62 search for food in the face of starvation. Numerous human conditions show aberrations in  
63 motivated behaviors, such as psychiatric disorders like depression or addiction, but also  
64 neurodegenerative diseases such as Parkinson's or dementia (1). The mechanistic dissection  
65 of the neural and molecular mechanisms of motivated behaviors is thus of considerable  
66 relevance to human health. Assays to measure motivation in animal models generally involve  
67 them exerting physical effort, or overcoming an aversive stimulus, such as walking across an  
68 electrified grid. When the external incentive is increased, rats for example, will cross a grid that  
69 delivers a larger electric shock (2). In addition to external incentives acting as motivators, the  
70 other main component to motivational behavior is the internal state and resulting drive of the  
71 animal (2). The integration and valuation of internal drive and external incentive is what stirs the  
72 animal into goal-directed action. Feeding is one of the fundamental actions in animals and is  
73 normally under tight regulation to keep an organism's energy expenditure and stores in balance.  
74 Eating disorders are common human dysregulations of feeding and are still not well understood  
75 at the molecular and neural level. Since all animals regulate their food intake, model organisms  
76 can help in the dissection of the mechanisms regulating the motivation of feeding behavior.  
77 The vinegar fly, *Drosophila melanogaster*, has been a genetic model organism for over 100  
78 years, and numerous assays exist to determine a fly's feeding behavior. These include  
79 measuring food consumption from a tiny capillary (3), or lacing the food with quantifiable  
80 substances, such as dyes (4, 5), radioactive compounds (6), or even oligonucleotides (7).  
81 Recently, additional assays have been developed that rely on feeding flies closing an electrical  
82 circuit that allows the interaction between fly and food to be measured in intensity and duration  
83 (8). Even though the latter assays do not measure actual ingestion, the time spent interacting  
84 with the food correlates well with the amount ingested (9). Thus, these assays are valuable  
85 additions due to of their wide temporal range – from milliseconds to days – over which they can  
86 record feeding events. Some of the above feeding assays have been coupled with bitter  
87 substances, in order to determine flies' willingness to overcome aversion to get to food, resulting  
88 in a measure of their feeding motivation (10). However, as flies become starved, their  
89 peripheral perception of bitterness decreases (11, 12). Thus, seemingly increased motivation  
90 can be caused, at least in part, by the decreased perception of the aversive stimulus in the first  
91 place, thereby confounding the quantitative assessment of flies' motivation.  
92 Here, we develop a novel feeding assay based on the FLIC (fly liquid-food interaction counter;  
93 (8)). Our novel assay allows for individual feeding wells to be paired with different amounts of

94 current delivered, enabling us to ask what variables motivate flies to overcome a higher current  
95 to obtain food. We show that external incentives and internal drive both act as feeding  
96 motivators. Lastly, we find that neuropeptide F (npF) also plays a role, albeit in the perception  
97 of the electrical current itself, thus revealing a novel function for this neuropeptide.

98

## 99 **RESULTS**

100 The fly liquid-food interaction counter (FLIC) is a *Drosophila* feeding assay that allows for  
101 continuous online feeding monitoring (8). When flies standing on a metal plate make contact  
102 with the liquid food, they complete an electrical circuit, which allows for precise measurement of  
103 the duration the flies interact with the food. In addition, the amplitude of the signal depends on  
104 whether flies touch the food with their legs (lower amplitude “leg events”) or engage in food  
105 consumption using their proboscis (higher amplitude “proboscis events”).

106 We wanted to determine whether the FLIC can be used to measure feeding-bout duration under  
107 various conditions. When we determined the median duration of feeding-bouts in a 15-min FLIC  
108 assay, we found that the duration increased with the length of prior food deprivation (Fig. 1 A).  
109 Similarly, feeding-bout duration also increased when we increased the amount of sucrose  
110 offered (Fig. 1 B, left). After an 18-hr food deprivation, the median feeding-bout length was 3.2  
111 sec on 400 mM sucrose. We similarly food deprived flies for 18 hr and then filmed them feeding  
112 on liquid sucrose in a petri dish. When we determined the duration of the first feeding bout, we  
113 again saw that bout duration increased with the amount of sucrose offered (Fig. 1 C). We also  
114 found that the median first bout lasted 12 sec on 64 mM sucrose, considerably longer than in  
115 the FLIC on the higher, 400 mM, sucrose concentration.

116 To try to understand this discrepancy in bout duration, we first tested the hypothesis that later  
117 bouts in the 15-min FLIC assay were shorter, as flies became satiated, thus lowering the  
118 measured median bout length. Analyzing only the first 5 bouts in the FLIC — from a total of 10  
119 flies — revealed a small, but not significant increase in bout duration (Fig.1 B, right). We thus  
120 rejected shortness of later bouts as the cause for the bout duration difference in the FLIC versus  
121 feeding in a dish. In our free-feeding filming experiment, we counted a brief disengagement of  
122 the proboscis, followed by immediate re-engagement of the proboscis with the food, as being  
123 part of one and the same feeding bout, reasoning that there was no interruption of the feeding  
124 by a distinctly different behavior. In the FLIC, proboscis interaction-bouts sometimes appear as  
125 long and isolated, and sometimes in clusters, interspersed with leg interactions (Fig. 1 D).  
126 When we examined the frequency distribution of the bout duration, we saw an obvious inflection  
127 point at 5 sec (*SI Appendix*, Fig. S1). We therefore grouped interaction-bouts containing at

128 least one proboscis interaction that were closer than 5 sec into one long bout. This led to a  
129 significant increase in the median bout duration in the FLIC on 400 mM sucrose, from 3.2 to 6.8  
130 sec (Fig. 1 *E*). Considering bout structure and grouping is therefore part of the reason why the  
131 bout duration in the FLIC is shorter than when free feeding.

132 However, even the bout-grouped median duration of 6.8 sec on 400 mM sucrose in the FLIC  
133 (Fig. 1 *E*) was still considerably shorter than the free-feeding median of 12 sec on 64 mM  
134 sucrose (Fig. 1 *C*). We therefore tested a third hypothesis, which posited that the current in the  
135 FLIC is causing a reduction in proboscis-interaction. To test this, we added a fluorescent dye to  
136 the sucrose solution in the FLIC and then measured the amount ingested in a plate reader, as  
137 we have done before (5). Indeed, turning on the FLIC current caused a significant reduction in  
138 food intake of both 64 and 400 mM sucrose (Fig. 2 *A*). This confirmed that the FLIC current is  
139 aversive to flies when they are feeding.

140 The FLIC has a fixed design, which includes a 10 MOhm resistor to limit the current flow when  
141 the circuit is closed (8). We redesigned the FLIC in a way that allowed us to modularly  
142 exchange this current-limiting resistor for each food well. Because this new assay also allowed  
143 us to increase the current, we named it the FLEA, for fly liquid-food electroshock assay. We  
144 first tested whether altering current flow when flies closed the circuit would have an impact on  
145 sucrose intake labeled with fluorescent dye. As hypothesized, the smaller the resistor, and the  
146 higher the current, the lower the amount of food ingested (Fig. 2 *B*). Similarly, the time spent  
147 interacting with the food as measured by the current signal in the FLEA was also shorter, the  
148 higher the current (Fig. 2 *C*).

149 We reasoned that we might make use of the current as an aversive stimulus and designed the  
150 FLEA as a 2-choice assay where one choice goes with higher current. We tested whether flies  
151 would prefer to interact with food that was paired with the lesser current, while food quality  
152 remained equal. Indeed, the flies' interaction preference changed as we altered the current-  
153 limiting resistor in one of the two wells (Fig. 2*D*), suggesting that we might be able to use the  
154 FLEA as an assay to measure feeding motivation. Such feeding experiments—asking whether  
155 flies are willing to overcome an aversive stimulus—have been described using bitter substances  
156 mixed in with one of the two feeding solutions (10). The willingness to overcome bitterness can  
157 then serve as a proxy for flies' feeding motivation. However, an assay including bitterness has  
158 a significant confounder: the perception of bitterness depends on the flies' food deprivation  
159 status, with hungry flies showing less bitter acuity (11, 12). We confirmed this by testing flies'  
160 willingness to overcome 1  $\mu$ M denatonium and indeed found significantly reduced aversion to  
161 this bitter substance with longer periods of food deprivation. Flies demonstrated less avoidance

162 (less negative interaction time preference) after 18 hr compared with shorter deprivation (Fig. 3  
163 A). We also determined the preference for proboscis (feeding) and leg (tasting) interactions  
164 separately, and both showed an effect with increased food deprivation (Fig. 3 B). This makes  
165 sense, since there are bitter sensory neurons located on both the legs and the proboscis (12,  
166 13). Our data thus confirmed that bitterness is discounted by food deprivation. To use the  
167 FLEA as an assay for feeding motivation, the perception of the current should not be altered by  
168 the duration of prior food deprivation. We therefore performed the same experiment as with  
169 denatonium, this time with current as the deterrent, varying the duration of prior food  
170 deprivation. Avoidance of the well with higher current increased with deprivation time (Fig. 3 C).  
171 This would suggest that flies actually become more sensitive to current as they are food  
172 deprived for longer. However, when we analyzed the proboscis and leg interaction preference  
173 separately, neither of them depended on the duration of food deprivation (Fig. 3 D). Flies  
174 strongly avoided proboscis interaction with the higher current, while leg interactions were  
175 insensitive. This suggested two things: first, in a setting of 10 vs 33 MOhm (Fig. 3 D), the leg-  
176 mediated current cannot be perceived, probably because it is considerably smaller than  
177 proboscis-mediated current (see Fig. 1 D). Second, because food deprivation increases the  
178 frequency of proboscis over leg events (as flies are hungry and want to feed), proboscis  
179 interactions become more prevalent after 18 hr of food deprivation. As the proboscis  
180 interactions are more sensitive to current than the leg interactions, this skews the total  
181 (proboscis+leg) interaction preference towards the negative, i.e lower-current well, explaining  
182 the apparent increase in sensitivity to current of total event preference with increasing food  
183 deprivation (Fig. 3 C).

184 Because our data suggested that current perception by the proboscis and by the legs is not  
185 discounted by food deprivation, we wanted to establish the FLEA as an assay for motivation,  
186 and we next tested whether an external incentive would induce flies to overcome a higher  
187 current. As hypothesized, 18 hr food-deprived flies showed less aversion to a higher current  
188 when the high-current well contained more sucrose (Fig. 4 A and B). Thus, flies are willing to  
189 overcome current, if enough of an external incentive is paired with it. Furthermore, the FLEA  
190 allowed us to assign a value on the incentive, which is the incentive size attractive enough to  
191 equal the aversion to a given current, resulting in a preference index of 0. In this experiment, it  
192 took a four-fold increase in sucrose concentration to offset the aversion to 10 MOhm current  
193 (Fig. 4).

194 Next, we wanted to test whether internal drive would induce flies to overcome higher current.  
195 To do so, we compared flies that were food-deprived for 6 vs. 18 hr, a time difference that has

196 been shown to lead to significant behavioral changes (14). When we first performed this  
197 experiment pairing 10 mM sucrose with 33 MOhm current versus 100 mM sucrose with the 10  
198 MOhm current, we found a slight trend, but no significant effect of food deprivation (data not  
199 shown). Using the 33 MOhm resistor leads to a current that does not deter flies from feeding  
200 (Fig. 2 B and C), thereby setting up a steep gradient against 10 MOhm current. We decided to  
201 instead use a resistor pair where both currents were perceptible to the flies. In a choice of these  
202 currents, each paired with 100 mM sucrose, flies preferred to interact with food paired with the  
203 lower 20 MOhm over the higher 4.7 MOhm current (Fig. 5 A). The median preference index in  
204 this setting was -0.19 (Fig. 5 A), which was considerably less aversive compared to our prior 33  
205 MOhm vs. 10 MOhm comparisons with equal sucrose, where the preference indices ranged  
206 from -0.41 to -0.62 (Fig. 2 D, 3 C, 4 A). This confirmed that our 20 vs. 4.7 MOhm setup  
207 presented a lesser current gradient than the initial 33 vs. 10 MOhm choice. As before (Fig. 3 C  
208 and D), the perception of the current in and of itself did not depend on the 6 vs. 18 hr duration of  
209 food deprivation (Fig. 5 A and B). When we next paired 100 mM sucrose with the higher 4.7  
210 MOhm current, this solution was equally palatable to 6-hr deprived flies as a 10 mM/20 MOhm  
211 pairing. However, after an additional 12 hr of food deprivation, the flies preferred the 100  
212 mM/4.7 MOhm well (Fig. 5 C and D), suggesting that an increased internal feeding drive caused  
213 the flies to be willing to overcome a higher current to obtain better food.

214 Lastly, we wanted to test the role of the neuropeptide F (npF) in feeding motivation, using our  
215 novel FLEA assay. Fly larvae showed an enhanced willingness to ingest bitter food with  
216 increased npF signaling, while reduced npF signaling made larvae ingest less bitter-laced food  
217 (15). This suggested that npF is involved in feeding motivation and that npF signaling might  
218 similarly cause flies to overcome higher current to get to better food. To our surprise, when we  
219 silenced npF neurons by overexpression of the inwardly rectifying Kir2.1 channel in *npF-Gal4*  
220 neurons, those flies were more attracted to the higher current side (10 MOhm/100 mM sucrose  
221 vs. 33 MOhm/10 mM; Fig. 6 A), the opposite result of what we expected. We then tested  
222 whether these flies were as sensitive to the current itself as their controls, and we found that  
223 they were less deterred by current when presented with equal sucrose in both wells (100 mM,  
224 10 vs. 33 MOhm; Fig. 6 B). This suggested that npF is required for proper perception of  
225 electroshock, a function for npF not previously proposed. We therefore wanted to replicate this  
226 finding using *npF-Gal4* driving a temperature sensitive *shibire<sup>ts</sup>* gene causing neuronal silencing.  
227 Larvae carrying *npF>shi<sup>ts</sup>* were previously shown to be more sensitive to quinine in the food at  
228 the restrictive temperature. We first wanted to replicate this finding in adult flies. Using our two-  
229 choice fluorescence consumption assay (5), we found that at the control temperature, 18 hr



230 food-deprived *npF>shi<sup>ts</sup>* flies preferred 100 mM sucrose/7 mM caffeine vs. 50 mM sucrose  
231 alone. However, at the restrictive 32° temperature these flies avoided the sucrose/caffeine  
232 solution (Fig. 6 C), consistent with the proposed model that npF is required to overcome  
233 bitterness in food (15). We then tested these flies in the FLEA, and again found that reduced  
234 npF signaling at the restrictive temperature lowered flies' avoidance to higher current at equal  
235 sucrose (Fig. 6 D). This again supported the hypothesis that npF signaling is involved in the  
236 perception of electroshock. Next, we assessed proboscis bout duration with varying current.  
237 There was no effect of silencing npF neurons (*npF>shi<sup>ts</sup>* flies) when current is imperceptible (33  
238 MOhm resistor). However, at higher currents (10 mOhm resistor), *npF>shi<sup>ts</sup>* flies showed a  
239 significantly increased median proboscis-bout duration at the restrictive temperature (Fig. 6 E).  
240 This suggested that npF signaling is required to inform flies of the aversive shock, which  
241 induces termination of a feeding bout. We also replicated this finding using npF receptor  
242 mutants, *npfR<sup>CO1896</sup>*, which also showed significantly longer proboscis-bout duration when  
243 exposed to greater current (10 MOhm resistor), but not on low/imperceptible current (33 MOhm;  
244 Fig. 6 F). Therefore, three distinct genetic *npF* manipulations supported the interpretation that  
245 npF signaling is required for proper perception of electroshock.

246

## 247 DISCUSSION

248 Here, we describe the FLEA as a novel feeding assay based on the design for the FLIC, where  
249 flies touch a liquid food source and complete an electrical circuit, leading to a small current (8).  
250 This allows for the precise measurement of feeding-time interactions and can be used  
251 longitudinally, over the course of days (8). We were interested in more short-term  
252 measurements to determine the variables affecting individual feeding bouts. As expected,  
253 feeding bouts were lengthened with increasing food quality, and prior food deprivation (Fig. 1 A  
254 and B). Because the absolute durations of these feeding bouts were considerably smaller than  
255 what we observed by filming freely feeding flies (Fig. 1 C), we suspected that the FLIC current  
256 might actually be aversive to the flies. Indeed, the FLIC current limited by a 10 MOhm resistor  
257 caused about a three-fold reduction in actual food ingestion (Fig. 2 A). Our data also showed  
258 that a 33 MOhm current was undetectable by the flies (Fig. 2 B), and they preferred to interact  
259 with a 33 MOhm feeding well over a 10 MOhm well, at over a 3:1 ratio (Fig. 2 D, 3 C, 4 A). The  
260 negative value of a 10 MOhm current is only offset by a four-fold increase in sucrose  
261 concentration. The current generated from a leg interaction is about 5 times smaller than that  
262 for a proboscis interaction (Fig. 1 D), and our data suggest that flies cannot detect the 10 MOhm  
263 current with their legs (Fig. 3 D and 4 B). This difference is of similar magnitude as the 10

264 MOhm aversive / 33 MOhm imperceptible current ratio, and overall our data suggest that while  
265 the 10 MOhm FLIC current is close to innocuous, it is aversive to flies touching the food with  
266 their proboscis and will report skewed durations of feeding interactions. Higher currents lead to  
267 even shorter food interactions and smaller volumes ingested (Fig. 2 B and C), but even at the  
268 highest, and very aversive 1 MOhm current, we found no evidence of flies being electrocuted.  
269 Based on these findings, we re-engineered a FLIC-like assay that allows for adjustable currents  
270 to be paired with each one of two feeding wells in order to measure flies' feeding motivation.  
271 Prior assays paired one well with a bitter substance, to gauge flies' motivation to overcome an  
272 aversive stimulus while feeding (10). One confound in this setup is that flies' devalue bitterness  
273 with increasing food deprivation (Fig. 3 A and B; (11)). This makes sense in the wild, where a  
274 (hungry) "beggar can't be a chooser", but it also means that assays of feeding motivation relying  
275 on bitterness as a deterrent are confounded by the flies' internal state of satiety. Thus, a fly's  
276 willingness to overcome a bitter substance is a combination of its internal deprivation state, or  
277 drive, plus a peripheral reduction in the perception of the bitterness in the first place (12). For  
278 the FLEA to be an improved measure of incentive motivation, we needed to show that the  
279 perception of the current would not change as a function of the internal feeding drive. Indeed,  
280 we found that increasing food deprivation from 6 to 18 hr did not alter flies' avoidance of higher  
281 current (Fig. 3 D and 5 B), while it did reduce their avoidance of bitter denatonium (Fig. 3 A and  
282 B). Using the FLEA, we then found that both increasing an external incentive (higher sucrose  
283 concentration, Fig. 4), as well as increasing flies' internal drive (longer food deprivation, Fig. 5 C  
284 and D) would induce them to overcome a larger current to obtain a higher quality food source.  
285 The FLEA therefore represents an improved *Drosophila* assay that can be used to quantitate  
286 incentive motivation in this highly manipulable model organism.  
287 The npF neuropeptide has previously been shown to be important for larvae to overcome bitter-  
288 laced food (15). We replicated these results in adult flies, where we found that reduced npF  
289 signaling made flies less willing to overcome bitter caffeine to obtain a preferable sucrose  
290 solution (Fig. 6 C). However, when we performed the equivalent experiment with high vs. low  
291 sucrose/current pairings, loss of npF had the opposite effect and made flies more willing to  
292 overcome higher current (Fig. 6 A). Control experiments with 3 distinct npF manipulations  
293 revealed that decreased npF signaling reduced flies' perception of current (Fig. 6). Our findings  
294 do not invalidate previous findings indicating that npF is involved in overcoming aversive stimuli  
295 in order to get superior food. However, we were unable to assess this, as we discovered here  
296 that npF is required for normal perception of the electroshock. The FLEA therefore revealed a  
297 novel function for this neuropeptide. Other than npF's involvement in feeding motivation and

298 overcoming bitterness (15), npF is also involved in the regulation of feeding and sleep, where  
299 increased npF signaling leads to more feeding and reduced sleep (16). It also acts as a gate for  
300 the retrieval of appetitive memories, ensuring that flies remember these memories when they  
301 are hungry (17). Furthermore, flies prefer to spend time in a place where their npF neurons are  
302 optogenetically activated (18). All these results are consistent with the model that npF is largely  
303 involved in motivation for positively reinforcing behaviors. However, male flies that are sexually  
304 frustrated – by lack of mating and continued rejection from already mated females – prefer to  
305 drink more alcohol (19). In that paradigm, frustrated males drink even more if they lack npF  
306 signaling, and increased npF signaling reduces their alcohol preference compared to controls.  
307 Thus, npF seems to mediate alcohol aversion (5, 19), possibly by enhancing the sensation of  
308 aversive stimuli. An involvement for npF in stimulus sensation/processing is also suggested by  
309 experiments showing that the L1 npF neurons are involved in peripheral olfactory sensitivity to  
310 ethyl butyrate (20). There is therefore precedent for npF's involvement in not just internal  
311 motivation, but also in processing of external stimuli. We here reinforce that idea, by using our  
312 novel fly liquid-food electroshock assay, to show that npF signaling is required for the proper  
313 perception/processing of an aversive external electroshock.

314

## 315 **METHODS**

316 **Fly Husbandry and Behavior.** Male flies, age 2-8 adult days were used for all experiments.  
317 Flies were grown and kept on standard cornmeal/agar medium at 25°C with 70% relative  
318 humidity. Male *w\* Berlin* flies were used as controls. Transgenic flies were outcrossed to the  
319 *w\* Berlin* genetic background for at least 5 generations. Food deprivation was done in vials  
320 containing 0.7% agar only, as a water source. Freely feeding flies were filmed in a petri dish  
321 with a liquid sucrose drop containing 0.3% blue #1 to ensure we only analyzed the first feeding  
322 bout when scoring the movies. The FLIC assays were performed as described (8). For the  
323 design of the FLEA, see SI Methods, but in brief, each of 8 feeding wells in the FLEA contains a  
324 modular slot for a small board with distinct size current-limiting resistors, which can be placed  
325 independently of each other. FLEA data was acquired with from arenas with 2 wells per arena.

326 **Data Analysis and Statistics.** The FLIC data was analyzed as described (8), in brief, signal of  
327 amplitude >100 was designated a proboscis event, and smaller amplitude interactions were  
328 deemed leg events. We also filmed flies in the FLIC and a correlation of the filmed behavior  
329 with the obtained FLIC signal and designations suggested a sensitivity and specificity of ~90%  
330 for distinguishing leg from proboscis events. In the FLEA, the signal amplitude is changed as a  
331 function of the current limiting resistor, and we normalized the data accordingly, such that we

332 obtained the same 0–1023 data range. The *Interaction Time Preference Index* was calculated  
333 by taking the difference in total time interacted between the two wells and dividing it by the sum  
334 of the time interacted with both wells. This yields an index of 0, if both wells are equally  
335 interacted with, and +1 or –1 if only one well was interacted with exclusively. For detailed  
336 processing and analysis of the FLIC and FLEA signal and data, see SI Methods. All data were  
337 checked for normality using Prism 8 (GraphPad Software Inc., San Diego, CA). Data were not  
338 normally distributed, and we excluded outliers for data sets with  $n > 8$  if they fell 1.5x the  
339 interquartile range outside of the upper and lower quartiles. Data were compared using Mann  
340 Whitney U-tests, for pairwise comparisons, and Kruskal-Wallis tests with Dunn’s correction for  
341 multiple comparisons.

342

343 **ACKNOWLEDGEMENTS.** We thank lab members for critical discussion of experiments and  
344 the manuscript. Flies were obtained from the Bloomington stock center. This work was funded  
345 by the NIH R01DK110358 (A.R.Ro.), NIH R01AA019526, R01AA026818 (A.R.), U2M2  
346 (A.R.Ro., A.R.) and the University of Utah Neuroscience Initiative (A.R.).

347

348

349

350

351 **FIGURES:**

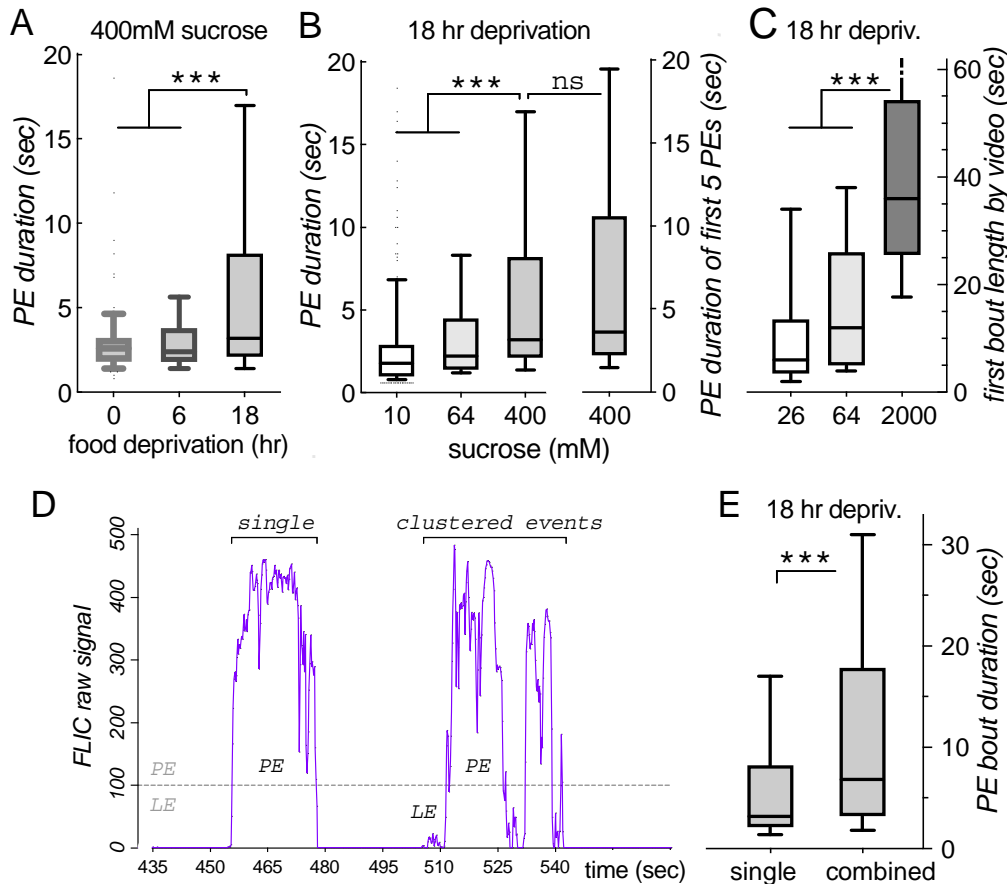

352

353

354 **Fig. 1.** Feeding bout length measured in the FLIC. (A) Longer food deprivation times result in  
 355 significantly longer proboscis events (PE) on 400 mM sucrose ( $***p < 0.001$ , Mann-Whitney test  
 356 with Dunn's correction,  $n = 233, 233, 349$  events. Here, and in following panels, the first 15  
 357 minutes of FLIC events were analyzed, unless specified otherwise). (B) PE durations are longer  
 358 when flies are offered higher sucrose concentrations (left side;  $***p < 0.0001$   $n = 75, 137, 349$ ).  
 359 If only the first 5 PEs per feeding well are analyzed (right side), the median PE duration  
 360 increases slightly, but not significantly (ns = not significant,  $p = 0.37$ ,  $n = 349, 143$ ). (C) Length  
 361 of first feeding bout as measured by video recording. The median length of bouts, here defined  
 362 as uninterrupted engagement with the liquid food, increase with sucrose concentration offered  
 363 ( $***p < 0.0001$ ,  $n = 45, 58, 46$ ). Note that the bouts are considerably longer when compared to  
 364 measurements in the FLIC (A,B). (D) Example data from a FLIC well (400 mM sucrose, 18 hr  
 365 deprivation). Some PEs occur in single isolation (left). Others come in clustered bouts of PEs  
 366 (right), together with leg events (LE, signal amplitude  $< 100$  over baseline), that follow in close

367 succession. (E) When PEs that occur in groups of events (with an inter-event interval of less  
 368 than 5 sec) are grouped into combined feeding events, the median bout length increases  
 369 significantly compared to analyzing all PEs as single bouts (as done in A;  $p < 0.0001$ ,  $n = 349$ ,  
 370 188; all data are shown as medians with quartile boxes and 10-90 percentile whiskers).  
 371

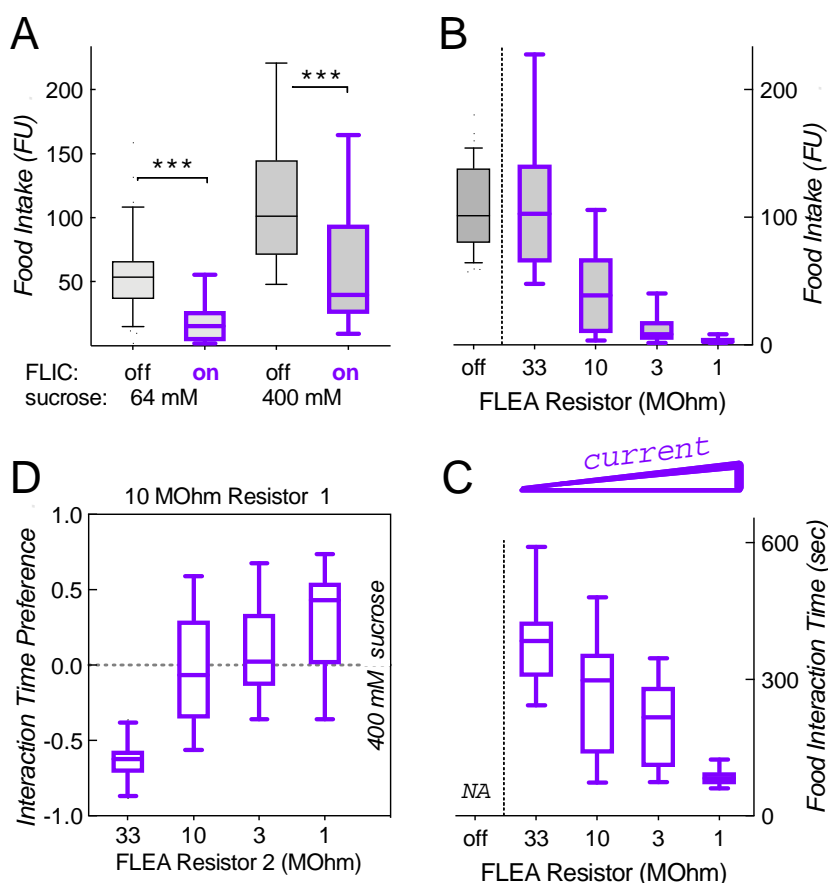

372  
 373 **Fig. 2.** FLIC current is aversive to flies. (A) Turning on FLIC current significantly reduces food  
 374 intake of 18-hr food deprived flies, as measured by fluorescent dye ingestion (FU =  
 375 fluorescence units measured in plate reader; \*\*\* $p < 0.0001$ ,  $n = 33-51$ ). (B) Redesigned FLIC  
 376 with adjustable current (FLEA) shows a decrease in food intake as a function of current ( $p <$   
 377  $0.0001$ ; one-way Kruskal-Wallis ANOVA,  $n = 28-39$ ). Note that the original FLIC contains a 10  
 378 MOhm resistor. (C) Food interaction time, as measured by the FLEA current, is also  
 379 significantly reduced as the current increases ( $p < 0.0001$ ;  $n = 11-12$ ; NA = not available). (D)  
 380 Flies change their interaction time preference as the current increases in one of two equal-  
 381 sucrose wells ( $p < 0.0001$ ;  $n = 10-11$ ).  
 382

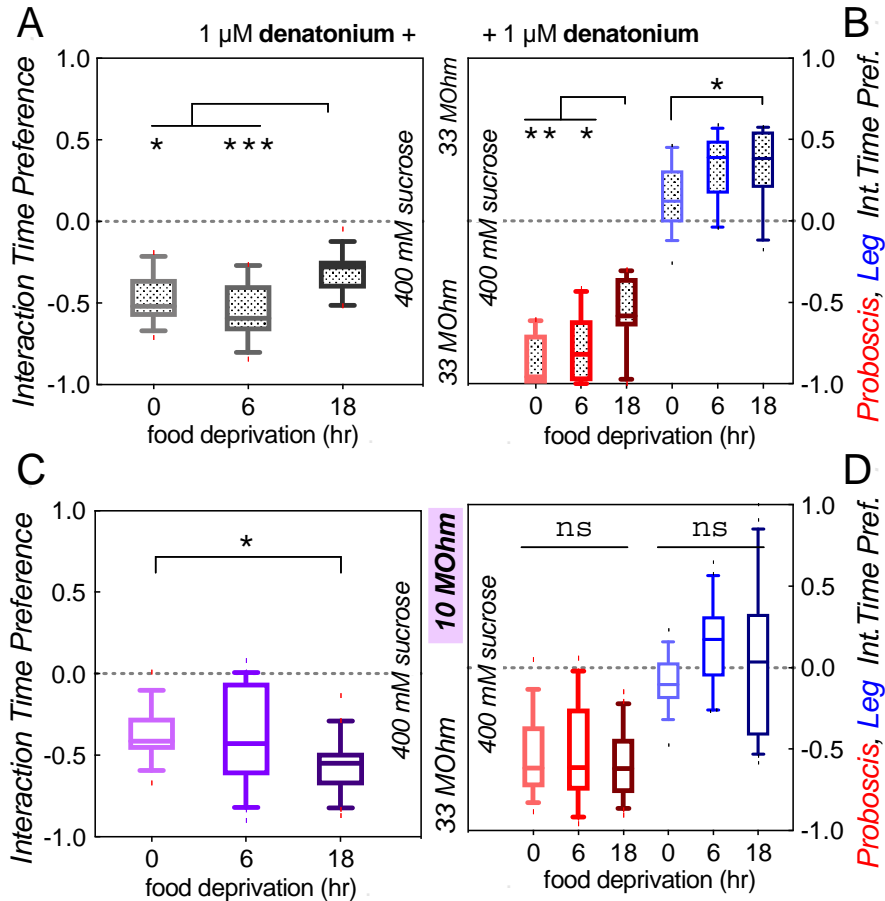

383

384

385 **Fig. 3.** Unlike bitterness, current is not discounted upon food deprivation. (A) 18-hr deprived  
 386 flies show reduced avoidance of denatonium (\*\* $p = 0.0011$ , \* $p = 0.0495$ , Kruskal-Wallis test  
 387 with Dunn's correction). (B) Both leg (blue, \* $p = 0.031$ ) and proboscis (red, \*\* $p = 0.0013$ , \* $p$   
 388 =0.039,  $n = 13-15$ ) interactions show decreased sensitivity to denatonium with increased food  
 389 deprivation. (C) Current avoidance increases with food deprivation when determining total  
 390 (proboscis+leg) interaction time (\* $p = 0.022$ ). (D) However, neither proboscis (red, ns = not  
 391 significant,  $p = 0.73$ ), nor leg (blue, ns  $p = 0.06$ ,  $n = 15-20$ ) interaction time preference changes  
 392 with food deprivation. The apparent decrease in total interaction preference in (C) is caused by  
 393 a shift from leg to proboscis interactions upon food deprivation, lowering the combined  
 394 Preference Index.

395

396

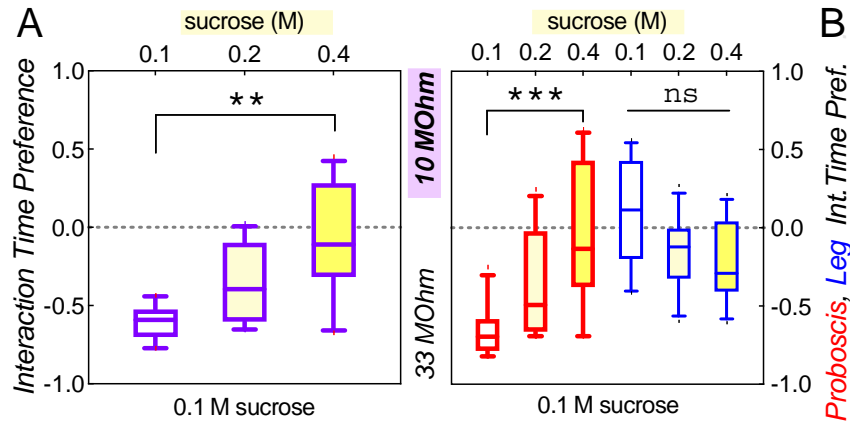

397

398

399 **Fig. 4.** An external sucrose incentive causes reduced current avoidance in food-deprived flies.

400 (A,B) Increasing the sucrose concentration in the food well with higher current reduces flies'

401 avoidance of that food well. Both total interaction preference (A,  $**p = 0.002$ , Kruskal-Wallis test

402 with Dunn's correction), as well as proboscis interaction preference (B,  $***p = 0.0009$ ,  $n = 10$ –

403 12) increase significantly with sucrose concentration. Flies were food-deprived for 18 hours

404 before testing.

405



406

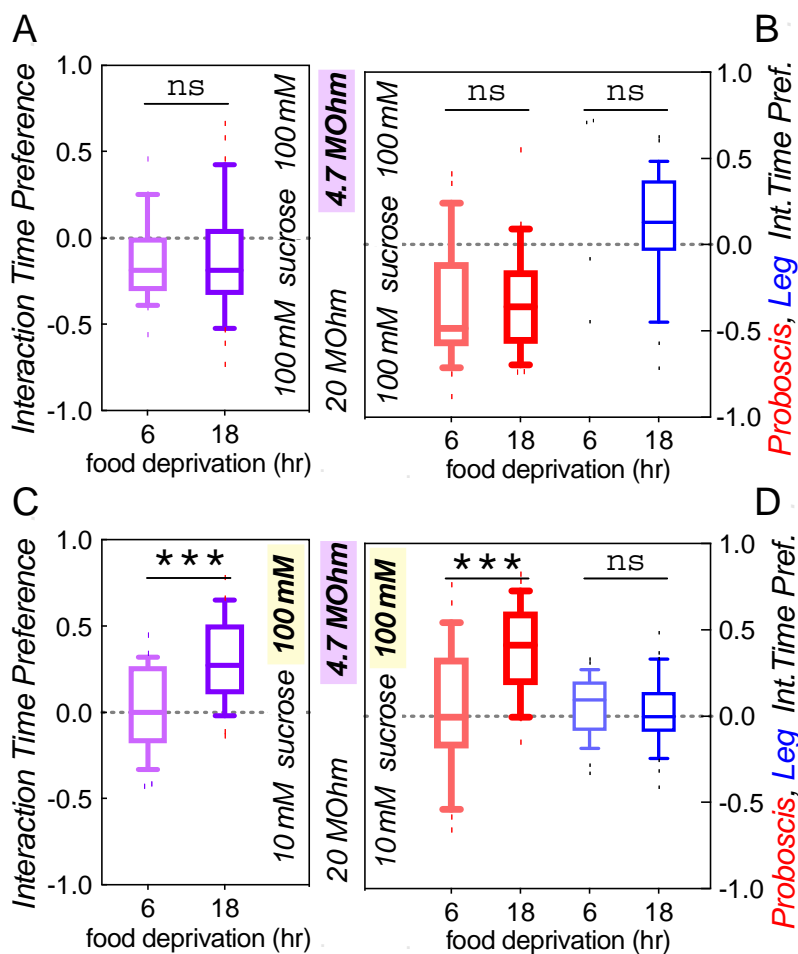

407

408

409 **Fig. 5.** Increased internal feeding drive causes reduced current avoidance. (A) Increasing the  
410 duration of food deprivation from 6 to 18 hr has no effect on flies' avoidance of 4.7 vs. 20 MOhm  
411 current at equal sucrose (ns  $p = 0.88$ , Mann-Whitney U test). (B) This was also true for  
412 proboscis and leg interaction preference (ns  $p = 0.50$  and  $0.42$ ,  $n = 27, 28$ ). (C) The  
413 combination of 100 mM sucrose with 4.7 MOhm current became attractive only after 18 hr of  
414 food deprivation (\*\* $p = 0.0005$ ). (D) This was also evident in the proboscis interaction  
415 preference (\*\* $p = 0.0005$ ), while leg interaction preference remained unchanged (ns  $p = 0.38$ ,  $n$   
416  $= 26, 30$ ).

417

418

419

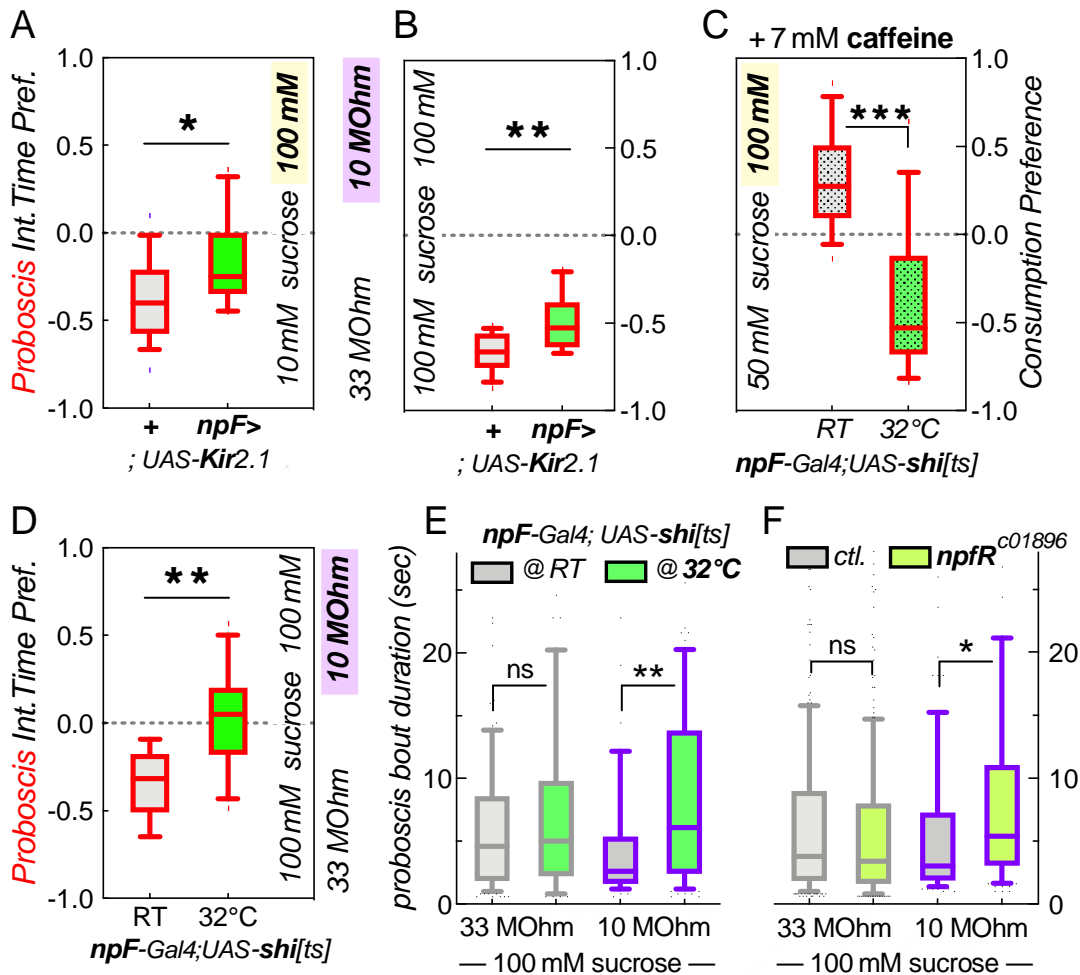

420

421 **Fig. 6.** Reduced npF signaling leads to reduced shock-avoidance. (A) Flies with reduced npF  
 422 signaling show decreased avoidance of a high current/high sucrose combination (\* $p = 0.017$ ,  
 423 Mann Whitney U-test,  $n = 18$ ). (B) These flies also show reduced avoidance of higher current at  
 424 equal sucrose concentration combination (\*\* $p = 0.006$ ,  $n = 13-14$ ). (C) 18 hr food-deprived flies  
 425 with reduced npF signaling show increased avoidance of a bitter caffeine/high sucrose  
 426 combination at the restrictive temperature in a fluorescence ingestion choice assay combination  
 427 (\*\* $p < 0.0001$ ,  $n = 15-16$ ). (D) These same flies show decreased avoidance of a higher current  
 428 combination (\*\* $p < 0.003$ ,  $n = 9-11$ ). (E) Reduced npF signaling also leads to an increase in  
 429 median proboscis bout length at the restrictive temperature with 10 MOhm current (\*\* $p =$   
 430  $0.0012$ ,  $n = 47, 86$ ), but not on the 33 MOhm, imperceptible current well (ns  $p = 0.14$ ,  $n = 103,$   
 431  $77$ ). (F) Similarly, mutation in the npF receptor leads to increased bout duration on the 10  
 432 MOhm (\*\*  $p = 0.007$ ,  $n = 96, 80$ ), but not 33 MOhm well (ns  $p = 0.20$ ,  $n = 255, 271$ ).

433

434 **Supplementary Information:**

435 Supplementary Methods

436 Figure S1

437

438

439

440 **SUPPLEMENTARY METHODS**

441 **FLEA system overview.** The FLEA system is comprised of five components: feeding unit,  
442 resistor modules, data acquisition device, NI LabVIEW software, and analysis software in R.  
443 The first component, the feeding monitoring unit is composed of a conductive metal baseplate,  
444 plastic reservoir, and printed circuit board. It houses eight feeding wells to conduct behavioral  
445 experiments. The second component, the resistor modules, is responsible for supplying current  
446 to each well in the feeding monitoring unit. The resistor modules are customizable to each of  
447 the 8 feeding wells and can be modularly exchanged. The third component, NI USB 6001 DAQ,  
448 is responsible for detecting analog signals from eight wells and forwarding the signal to the  
449 fourth component, NI LabVIEW software. The LabVIEW data acquisition software, NI  
450 SignalExpress, allows modification and customization of all the parameters of the system and  
451 record the data. For the last component, the R statistical analysis software is used for analyzing  
452 and visualizing the data and time preference analysis for behavioral experiments.

453 **FLEA hardware.** The behavior board are composed of an aluminum plate, a plastic food  
454 reservoir, and a plastic cover based on the design of the FLIC. A custom-made circuit board  
455 (AutoDesk EAGLE design available upon request) allows for the use of 8 wells and has  
456 receiving slots for 4 current resistor modules. The printed circuit board, the resistor modules,  
457 and the NI USB 6001 DAQ contain all the electronics needed for signal recognition, power  
458 supply to the board, and signal forwarding contacts to a computer for data acquisition. The  
459 printed circuit board contains two non-inverting operational amplifiers to provide a systemic gain  
460 of approximately 1.2, and it also contains 2x6 board-to-board male contacts for the attachment  
461 of resistor modules to the printed circuit board. The resistor module is the component that  
462 supplies current each well. It contains two customizable current limiting resistors, one for each  
463 well of a 2-well choice arena, and four gain resistors: two per well. The current limiting resistors  
464 are used to regulate the amount of electrical current permitted to pass through the flies.

465 **FLEA signal processing and analysis.** FLEA raw signal data is sampled at 500 Hz. A simple  
466 low-pass filter was utilized with the window size of 100 to reduce noise. Then, one mean data  
467 point was generated from the filtered signal for every 100 points to reduce the sampling rate  
468 from 500 Hz to 5 Hz. The process of filtering and sample rate reduction results in better  
469 resolution than sampling at 5 Hz. Then, filtered data was converted to the same scale as FLIC  
470 readings intensities ranging from 0 to 1023. The conversion factor for each current-limiting  
471 resistor was determined by measuring signal amplitude from circuits closed by defined resistors,  
472 standing in for flies. Baseline intensity varies linearly and/or nonlinearly through time. For a  
473 linear baseline, the baseline estimation was performed by computationally estimating zero-slope  
474 baseline. For non-linear baseline, we implemented a non-linear, non-parametric baseline  
475 adjustment algorithm – local polynomial regression (Loess; (21)) – to computationally estimate  
476 the baseline. Loess is a locally weighted polynomial regression performed via iterations of an  
477 M-estimation procedure with tricube kernel and Tukey's biweight function as weighting  
478 parameters for time and intensity (21). Window span and polynomial degree of regression were  
479 specified independently for each dataset. Baseline correction of FLEA data was then performed  
480 by subtraction of the estimated baseline. Residuals of baseline estimation were removed by  
481 zeroing values less than 4au intensity.

482 Each detected peak was classified as a leg event (LE, maximal intensity <100) or proboscis  
483 event (PE, maximal intensity  $\geq$ 100). Additionally, we identified exclusion criteria to eliminate  
484 false positive events (like food splatter), device errors, and to better correlate feeding events  
485 with flies' observed behavior. Exclusion criteria for number of events per assay were derived  
486 from large pooled datasets from various conditions with the cutoffs based on the mean  $\pm$  2.5  
487 standard deviations (eg. between 4 and 212 events for a 30-min assay). Similarly, the  
488 exclusion criteria for event duration was calculated based on the third quartile plus 2x the inter-  
489 quartile range (which came to 4 and 40 seconds, for leg and proboscis events, respectively).

490

491

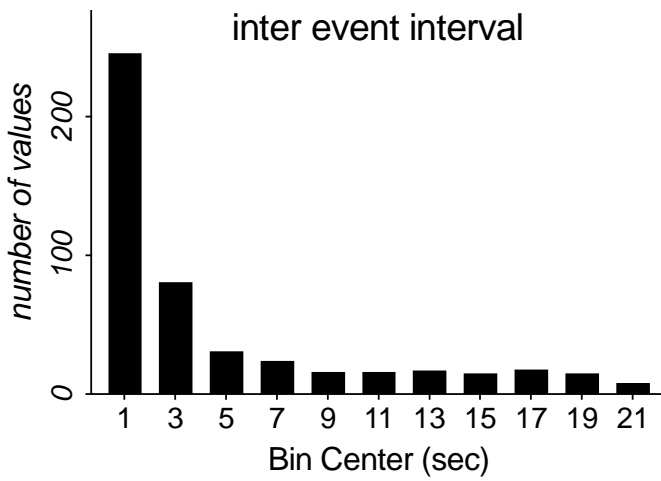

492

493 **Supplementary Figure 1.** Frequency plot of inter-event intervals from the FLIC (related to Fig. 1

494 *D*). We chose 5 sec, the inflection point of this distribution, to group events together, or apart.

495

496

497

498 **References:**

- 499
- 500 1. Chong TT-J (2018) Updating the role of dopamine in human motivation and apathy.  
501 *Current Opinion in Behavioral Sciences* 22:35–41.
  - 502 2. Olds J (1976) Brain Stimulation and the Motivation of Behavior. *Progress in Brain*  
503 *Research* 45:401–426.
  - 504 3. Ja WW, et al. (2007) Prandiology of *Drosophila* and the CAFE assay. *Proc Natl Acad Sci*  
505 *USA* 104(20):8253–8256.
  - 506 4. Shell BC, et al. (2018) Measurement of solid food intake in *Drosophila* via consumption-  
507 excretion of a dye tracer. *Sci Rep* 8(1):11536–13.
  - 508 5. Peru y Colon de Portugal RL, et al. (2014) Long-lasting, experience-dependent alcohol  
509 preference in *Drosophila*. *Addict Biol* 19(3):392–401.
  - 510 6. Deshpande SA, et al. (2014) Quantifying *Drosophila* food intake: comparative analysis of  
511 current methodology. *Nat Meth* 11(5):535–540.
  - 512 7. Park A, Tran T, Atkinson NS (2018) Monitoring food preference in *Drosophila* by  
513 oligonucleotide tagging. *Proc Natl Acad Sci USA* 115(36):9020–9025.
  - 514 8. Ro J, Harvanek ZM, Pletcher SD (2014) FLIC: high-throughput, continuous analysis of  
515 feeding behaviors in *Drosophila*. *PLoS ONE* 9(6):e101107.
  - 516 9. Itskov PM, et al. (2014) Automated monitoring and quantitative analysis of feeding  
517 behaviour in *Drosophila*. *Nat Commun* 5:4560.
  - 518 10. Devineni AV, Heberlein U (2009) Preferential Ethanol Consumption in *Drosophila* Models  
519 Features of Addiction. *Current Biology* 19(24):2126–2132.
  - 520 11. Inagaki HK, Panse KM, Anderson DJ (2014) Independent, reciprocal neuromodulatory  
521 control of sweet and bitter taste sensitivity during starvation in *Drosophila*. *Neuron*  
522 84(4):806–820.
  - 523 12. LeDue EE, et al. (2016) Starvation-Induced Depotentiation of Bitter Taste in *Drosophila*.  
524 *Curr Biol* 26(21):2854–2861.
  - 525 13. French A, et al. (2015) *Drosophila* Bitter Taste(s). *Front Integr Neurosci* 9:58.
  - 526 14. Dus M, Min S, Keene AC, Lee GY, Suh GSB (2011) Taste-independent detection of the  
527 caloric content of sugar in *Drosophila*. *Proc Natl Acad Sci USA* 108(28):11644–11649.
  - 528 15. Wu Q, Zhao Z, Shen P (2005) Regulation of aversion to noxious food by *Drosophila*  
529 neuropeptide Y- and insulin-like systems. *Nat Neurosci* 8(10):1350–1355.
  - 530 16. Chung BY, et al. (2017) *Drosophila* Neuropeptide F Signaling Independently Regulates  
531 Feeding and Sleep-Wake Behavior. *Cell Rep* 19(12):2441–2450.
  - 532 17. Krashes MJ, et al. (2009) A neural circuit mechanism integrating motivational state with  
533 memory expression in *Drosophila*. *Cell* 139(2):416–427.

- 534 18. Shao L, et al. (2017) Dissection of the *Drosophila* neuropeptide F circuit using a high-  
535 throughput two-choice assay. *Proc Natl Acad Sci USA* 114(38):E8091–E8099.
- 536 19. Shohat-Ophir G, Kaun KR, Azanchi R, Heberlein U (2012) Sexual deprivation increases  
537 ethanol intake in *Drosophila*. *Science* 335(6074):1351–1355.
- 538 20. Lee S, Jones WD, Kim D-H (2020) A cyclic nucleotide-gated channel in the brain  
539 regulates olfactory modulation through neuropeptide F in fruit fly *Drosophila*  
540 *melanogaster*. *Arch Insect Biochem Physiol* 103(1):e21620.
- 541 21. Jacoby WG (2000) Loess: a nonparametric, graphical tool for depicting relationships  
542 between variables. *Electoral Studies* 19(4):577–613.
- 543
